# 1 **KIAA0319 influences cilia length, cell migration and mechanical** 2 **cell-substrate interaction**

3 Rebeca Diaz,<sup>1</sup>† Nils M. Kronenberg,<sup>2,3</sup>† Angela Martinelli,<sup>1</sup> Philipp Liehm,<sup>2</sup> Andrew C.  
4 Riches,<sup>1</sup> Malte C. Gather,<sup>2,3</sup>\* Silvia Paracchini<sup>1</sup>\*

5  
6 † These authors have contributed equally to this paper

7 <sup>1</sup> School of Medicine, University of St Andrews, St Andrews, KY16 9TF, UK

8 <sup>2</sup> SUPA, School of Physics and Astronomy, University of St Andrews, St Andrews,  
9 KY16 9SS, UK

10 <sup>3</sup> Centre for Nanobiophotonics, Department of Chemistry, University of Cologne, 50939  
11 Cologne, Germany

12 \* Corresponding authors:

13 Silvia Paracchini [sp58@st-andrews.ac.uk](mailto:sp58@st-andrews.ac.uk)

14 Malte Gather [mcg6@st-andrews.ac.uk](mailto:mcg6@st-andrews.ac.uk)

15

## 16 **Keywords:**

17 **KIAA0319, neurodevelopment, dyslexia, cilia, podosomes, cytoskeleton, CRISPR,**  
18 **force microscopy, mechanobiology**

19

20

## 21 ***Abstract***

22 Following its association with dyslexia in multiple genetic studies, the KIAA0319 gene has  
23 been extensively investigated in different animal models but its function in neurodevelopment  
24 remains poorly understood.

25 We developed the first cellular knockout model for KIAA0319 via CRISPR-Cas9n to  
26 investigate its role in processes suggested but not confirmed in previous studies, including cilia  
27 formation and cell migration. We found that KIAA0319 knockout increased cilia length and  
28 accelerated cell migration. Using Elastic Resonator Interference Stress Microscopy (ERISM),  
29 we detected an increase in cellular force for the knockout cells that was restored by a rescue  
30 experiment. Combining ERISM and immunostaining we show that KIAA0319 depletion  
31 reduces the number of podosomes formed by the cells.

32 Our results suggest an involvement of KIAA0319 in cilia biology and force regulation and  
33 show for the first time that podosomes exert highly dynamic, piconewton vertical forces in  
34 epithelial cells.

## 35 ***Introduction***

36 Dyslexia is a neurodevelopmental disorder that affects around 5% of school-aged children and  
37 refers to unexpected difficulties in learning to read [1]. Dyslexia is highly heritable (up to 70%).  
38 Genetic studies, mainly in family-based samples, have focused their attention on genes that  
39 play a role in neurodevelopment, including *DYX1C1*, *DCDC2*, *ROBO1* and *KIAA0319* [2].  
40 Functional analysis of these genes have largely contributed to shape hypotheses aimed at  
41 explaining the neurobiology of dyslexia. Initial *in utero* gene silencing experiments in rats for  
42 these genes provided strong support for the neuronal migration hypothesis [3] first proposed in  
43 the eighties [4]. This hypothesis is based on the observation of subtle cortical anomalies, i.e.  
44 heterotopias and microgyrias, in post-mortem brains from individuals with dyslexia ( $n = 8$ ).  
45 Such anomalies are likely to be the result of neuronal migration defects. However, knockout  
46 mouse models for *DYX1C1*, *DCDC2* and *KIAA0319* did not exhibit cortical alterations [5],  
47 although heterotopias were observed in rats subjected to *in utero* knockdown of *Dyx1c1* [6].  
48 The discordance between knockdown experiments in rat and knockout mouse models has been  
49 explained by species-specific effects, compensatory mechanisms in mice, or artefacts in  
50 shRNA experiments, and has been highlighted by recent reviews of the literature, providing  
51 interpretations either in support or raising doubts about the neuronal migration hypothesis  
52 [5,7,8].

53 In parallel, emerging evidence supports roles of *DCDC2*, *DYX1C1*, *ROBO1* and *KIAA0319* in  
54 cilia biology [2]. Transcriptomic studies showed differential expression for these genes in  
55 ciliated tissue [9–11]. Beyond these studies, a role of *KIAA0319* in cilia biology has not been  
56 described yet, but cellular and animal knockouts for *DCDC2* and *DYX1C1* presented cilia  
57 defects. Mutations in *DYX1C1* and *DCDC2* have been identified in patients with ciliopathies,  
58 a group of disorders caused by defective cilia and often characterised by alterations in body  
59 asymmetry. *ROBO1* has been shown to localize to the cilium of mouse embryonic  
60 interneurons. Cilia biology has been proposed as a molecular link to explain the atypical brain  
61 asymmetries which are consistently reported for neurodevelopmental disorders, such as  
62 dyslexia [12,13].

63 *KIAA0319* encodes a transmembrane protein with five PKD domains [14,15] (Figure 1A). Such  
64 structures have been previously found in cell surface proteins and are known to be involved in  
65 cell-cell and cell-matrix interactions [16] but the cellular function of *KIAA0319* remains  
66 largely uncharacterised [5]. *KIAA0319* has also been suggested to play a role in signalling

67 pathways [17] and in axon growth inhibition [18]. A gene expression analysis in zebrafish  
68 showed very high expression in the first hours of development and specific signal in defined  
69 embryonic structures, including the notochord and the developing eye and otic vesicles [19].  
70 Moreover, in support of the importance of KIAA0319 in brain function, a recent study suggests  
71 a possible role of KIAA0319 in Alzheimer's disease [20].

72 In spite of these intensive efforts, the precise role of KIAA0319 remains unexplained. The  
73 initial neuronal migration hypothesis is not consistently supported, and direct evidence for a  
74 role in cilia biology, similarly to other genes implicated in dyslexia, has not been described yet.  
75 To address this issue, we generated the first cellular knockout model of KIAA0319 in human  
76 cells to specifically investigate its role in cilia biology and neuronal migration, addressing the  
77 two main hypotheses currently proposed. We used retina pigmented epithelium cells (RPE1),  
78 which are particularly suitable to study cilia, and studied their mechanobiology using a range  
79 of assays including the recently introduced Elastic Resonator Interference Stress Microscopy  
80 (ERISM) [21,22] that allows for continuous imaging of cell forces with high spatial resolution  
81 and over extended periods of time.

82 We show that loss of KIAA0319 leads to longer cilia, changed migratory behaviour and  
83 increased cellular force exertion. In addition, our data indicate that KIAA0319 knockout cells  
84 form fewer podosomes, structures that have been shown to have mechanosensitive function via  
85 the exertion of oscillating, vertical forces [23]. However, mechanical activity of podosomes  
86 had not been observed and measured in epithelial cells before.

## 87 ***Results***

### 88 ***Generation of KIAA0319 KO in RPE1 cell lines***

89 We generated KIAA0319 knockout RPE1 cells with CRISPR-Cas9n based genome editing.  
90 The *KIAA0319* main isoform (NM\_014809) consists of 21 exons and spans 102 kb of human  
91 chromosome 6 (Figure 1A). We generated a biallelic knockout (Ex6KO) by causing deletions  
92 that introduce premature stop codons at exon 6 of *KIAA0319* using paired gRNAs (Figure 1B).  
93 The deletion was confirmed by RT-PCR (Figure 1C). Transcript quantification by qRT-PCR  
94 shows that KIAA0319 expression in Ex6KO is five-times lower than the wild-type (*t*-test,  
95  $p \leq 0.001$ ) which is consistent with degradation of the transcript by nonsense-mediated decay  
96 [24] (Figure 1D). We characterised the KIAA0319 knockout to address two specific

97 hypotheses emerging from the literature. Specifically we tested whether KIAA0319 might play  
98 a role in i) cilia and ii) neuronal migration.

### 99 ***KIAA0319 knockout cells form longer primary cilia***

100 We measured cilia length in RPE1 wild type (WT) and Ex6KO cells by staining of the cilium-  
101 specific protein ARL13B and analysis of epi-fluorescence images (Figure 2A & B). While a  
102 similar fraction of WT and Ex6KO cells formed cilia (WT: 379/571, 68%; Ex6KO: 271/383,  
103 70%), the cilia in Ex6KO were significantly longer than in the wild type (mean  $\pm$  SEM: WT:  
104 4.5  $\mu\text{m} \pm 0.1 \mu\text{m}$ ,  $n = 129$ ; Ex6KO: 6.1  $\mu\text{m} \pm 0.2 \mu\text{m}$ ,  $n = 104$ ;  $t$ -test:  $p \leq 0.001$ ; Figure 2C).

### 105 ***Migration speed, cell morphology, and force exertion are altered in KIAA0319 knockout*** 106 ***cells***

107 The second hypothesis we investigated was the role of KIAA0319 in cell migration. We started  
108 by comparing WT and KO with a scratch assay on confluent layers of cells to test collective  
109 cell migration. The assays did not reveal a significant difference in the capacity to cover the  
110 empty space between WT and Ex6KO cells after 24 h (mean cell coverage  $\pm$  SEM: WT:  
111 27.4%  $\pm 4.2\%$ ,  $n = 3$ ; Ex6KO: 30.2%  $\pm 3.5\%$ ,  $n = 3$ ;  $t$ -test:  $p = 0.63$ ; Figure S1).

112 Next, we turned to investigations on the single cell level, characterizing migration speed and  
113 cell morphology through detailed analysis of phase contrast microscopy and, in parallel,  
114 mapping the mechanical forces exerted by the cells using ERISM. For ERISM, cells are  
115 cultured on substrates that consist of a layer of an ultra-soft elastomer situated between two  
116 semi-transparent, mechanically flexible gold mirrors, which form an optical micro-cavity.  
117 Mechanical force and stress exerted by cells cause local deformations of the soft micro-cavity  
118 (the effective stiffness of cavities used in this study is 6 kPa). This in turn leads to local shifts  
119 in cavity resonance that are analysed by optical modelling to compute a high-resolution  
120 displacement map with  $\mu\text{m}$  lateral resolution and nm vertical resolution [22], which allows for  
121 the detection of forces in the piconewton range. In our earlier work [21], ERISM has been  
122 extensively calibrated (through application of well-defined forces by an atomic force  
123 microscope) and validated (through measurements on widely studied cell lines). The substrates  
124 used for ERISM are semi-transparent, thus allowing to combine force mapping with high-  
125 resolution imaging.

126 WT and Ex6KO cells were plated on ERISM substrates at a density low enough to ensure non-  
127 confluency and thus allow the behaviour of individual cells to be analysed (Figure 3A).

128 Quantitative image analysis showed that Ex6KO cells covered a smaller surface area than WT  
129 cells (mean cell area  $\pm$  SEM: WT:  $2052 \mu\text{m}^2 \pm 91 \mu\text{m}^2$ ,  $n = 36$ ; Ex6KO:  $1295 \mu\text{m}^2 \pm 65 \mu\text{m}^2$ ,  
130  $n = 36$ ;  $t$ -test:  $p \leq 0.001$ ; Figure 3B), even though the shape and morphology of the cells did  
131 not differ. The displacement maps recorded with ERISM (Figure 3A) revealed that cells from  
132 both lines generated similar spatial patterns of force on their substrate (even though absolute  
133 forces were markedly different, see next section): pulling was focused around the two long  
134 ends of the cells, perpendicular to the direction of migration (cells were polarised in a way that  
135 the nucleus was positioned posterior to the direction of migration). Downward compression  
136 was observed underneath the centre of the cells. This displacement pattern is a fingerprint for  
137 the exertion of contractile forces by adherent cells [21].

138 The migratory behaviour and the associated dynamics of force exertion of WT and Ex6KO  
139 cells were then investigated by taking time-lapse measurements of phase contrast and ERISM  
140 displacement maps in five-minute intervals over a time span of 17 hours (Movie S1 & S2). The  
141 average speed of single cell migration was significantly higher for Ex6KO than for WT cells  
142 (mean speed  $\pm$  SEM: WT:  $0.32 \mu\text{m min}^{-1} \pm 0.02 \mu\text{m min}^{-1}$ ,  $n = 29$ ; Ex6KO:  $0.40 \mu\text{m min}^{-1}$   
143  $\pm 0.02 \mu\text{m min}^{-1}$ ,  $n = 24$ ,  $t$ -test:  $p = 0.02$ ; only cells with free movement for  $\geq 2$  h were  
144 included in analysis; Figure 3C). To assess the force exerted by cells, we computed the total  
145 volume by which each cell indents into the substrate and used this as a proxy for the applied  
146 force [21]. Comparing the temporal averages of applied force during migration showed that  
147 Ex6KO cells exerted significantly stronger contractile forces on the substrate than WT cells  
148 (mean indented volume  $\pm$  SEM: WT:  $168 \mu\text{m}^3 \pm 16 \mu\text{m}^3$ ,  $n = 29$ ; Ex6KO:  $273 \mu\text{m}^3 \pm 24 \mu\text{m}^3$ ,  
149  $n = 24$ ;  $t$ -test:  $p = 0.0006$ ; only cells with free movement for  $\geq 2$  h were included in analysis;  
150 Figure 3D).

151 Next, we investigated changes in migration speed and exerted force over time (Figure S2A).  
152 WT and Ex6KO cells showed no differences in how migration speed and applied force  
153 fluctuated when normalising data to the respective means (Figure S2B & C). For both WT and  
154 Ex6KO cells, intervals of increased migration speed correlated with drops in cell forces (anti-  
155 correlation between the first time derivative of speed and the first time derivative of mechanical  
156 activity). Again, there was no significant difference in this correlation between the two groups  
157 (Figure S2D, F & G). Furthermore, the straightness of the migration was not affected by the  
158 KIAA0319 knockout (Figure S2H).

159 To validate our findings of the impact of KIAA0319 on cell area and cell force, we conducted  
160 a rescue experiment by generating an Ex6KO cell line with stable expression of KIAA0319-  
161 GFP fusion protein (Ex6KO K-GFP; Figure 4A). We also generated a control line of RPE1  
162 WT cells with the same construct (WT K-GFP). Even though the KIAA0319 rescue did not  
163 recover the reduction in cell area seen for Ex6KO cells [mean cell area  $\pm$  SEM: WT:  $2315$   
164  $\mu\text{m}^2 \pm 200 \mu\text{m}^2$ ,  $n = 16$ ; WT K-GFP:  $2299 \mu\text{m}^2 \pm 107 \mu\text{m}^2$ ,  $n = 20$ ; Ex6KO:  
165  $1565 \mu\text{m}^2 \pm 123 \mu\text{m}^2$ ,  $n = 23$ ; Ex6KO K-GFP:  $1297 \mu\text{m}^2 \pm 131 \mu\text{m}^2$ ,  $n = 17$ ; Figure 4B], the  
166 level of cell force was restored in Ex6KO K-GFP cells [mean indented volume  $\pm$  SEM: WT:  
167  $115 \mu\text{m}^3 \pm 14 \mu\text{m}^3$ ,  $n = 16$ ; WT K-GFP:  $96 \pm 9 \mu\text{m}^3$ ,  $n = 19$ ; Ex6KO:  $186 \pm 20 \mu\text{m}^3$ ,  $n = 24$ ;  
168 Ex6KO K-GFP:  $125 \pm 16 \mu\text{m}^3$ ,  $n = 16$ ;  $t$ -test(WT vs. Ex6KO):  $p = 0.01$ ,  $t$ -  
169 test(WT vs. Ex6KO K-GFP):  $p = 0.67$ ; Figure 4C)].

### 170 ***RPE1 KIAA0319 WT and Ex6KO show different fine patterns of force exertion***

171 Given the differences in cilia length, cell area, migration speed and exerted force, we reasoned  
172 that KIAA0319 knockout might affect cytoskeleton dynamics. To test this hypothesis, we took  
173 phase contrast and ERISM time-lapse measurements of migrating WT and Ex6KO cells at 5  
174 seconds intervals (Movie S3 & S4), and fixed and immunostained the cells for actin and  
175 vinculin immediately after the time-lapse.

176 For further analysis, spatial Fourier-filtering of ERISM maps was used to filter out broad  
177 deformation features associated with the overall contractility of cells and thus resolve finer  
178 details linked to interaction of sub-cellular components, e.g. focal adhesions or podosomes,  
179 with the substrate [21]. (For further discussion on the displacement fine-structure in Fourier-  
180 filtered displacement maps see Figure S3.) Figure 5A shows phase contrast images, Fourier-  
181 filtered ERISM maps and immunofluorescence microscopy images for a WT and Ex6KO cell.  
182 The Fourier-filtered displacement maps of both cells showed numerous small push-pull  
183 features that co-localised with vinculin-rich areas in the immunofluorescence microscopy  
184 images (see insets ii and iii to Figure 5A for examples of this feature). Vinculin is enriched in  
185 the centre between pulling (red areas in Fourier-filtered ERISM maps) and pushing (green  
186 areas). The actin fibres are connected to vinculin. Push-pull features in Fourier-filtered ERISM  
187 maps were previously attributed to focal adhesions transmitting horizontal forces that are  
188 generated by the actin cytoskeleton to the substrate [21]. In agreement with these earlier  
189 observations, the axes defined by the push-pull features co-aligned with the actin fibres that  
190 connect different vinculin-rich sites (best visible in the Ex6KO cell in Figure 5A and

191 Figure S3). This push-pull behaviour is also consistent with earlier observations of torque being  
192 applied by focal adhesions [25].

193 The formation and alignment of stress fibres was less distinct in the WT cell than the Ex6KO  
194 cell. As a result, the above-mentioned co-alignment of actin, vinculin and ERISM push-pull  
195 features was also less pronounced for the WT cell. In agreement with this, the forces exerted  
196 by single focal adhesions were smaller in the WT cell than in the Ex6KO cell (Figure 5C & D).

197 Besides the push-pull features associated with focal adhesions, the Fourier-filtered ERISM  
198 displacement maps also showed tightly confined pushing sites with a diameter of about 2  $\mu\text{m}$   
199 (best visible as green-blue areas highlighted with black arrow heads in Fourier-filtered ERISM  
200 map of Figure 5A; see inset i to Figure 5A for an example of this feature). These pushing sites  
201 were surrounded by circularly arranged dots of upward pulling (red areas).  
202 Immunocytochemistry analysis showed that the pushing sites corresponded to actin-rich  
203 locations (white arrow heads in epi-fluorescence image of Figure 5A), whereas pulling around  
204 the pushing sites colocalised with vinculin-rich positions (inset i to Figure 5A). This protein  
205 arrangement is a hallmark of podosomes, a cellular adhesion structure that is chiefly formed in  
206 monocyte-derived cells [26] but that has also been reported in spreading and migrating epithelia  
207 cells [27].

208 The time-lapse measurement revealed that the podosomes exerted an oscillating vertical force  
209 that reached maximum values of up to 80 pN (Figure 5B). The horizontal contractile forces  
210 transmitted by focal adhesions were roughly 100-times larger than the vertical indentation  
211 forces exerted by podosomes (Figure 5C & D). However, while podosomal pushing was highly  
212 dynamic, the horizontal forces originating from focal adhesions were relatively static and  
213 showed little oscillation in force. Focal adhesions at the leading edge of the cell were chiefly  
214 stationary once assembled (top right in Movie S4) and any lateral movement of focal adhesions  
215 was confined to the trailing edge of the cell (bottom left in Movie S4).

216 The WT and Ex6KO cell shown in Figure 5 and Movie S3 & S4 are examples illustrating the  
217 general differences between the two force transmission patterns (podosomes and focal  
218 adhesion). In total, combined ERISM and immunochemistry measurements were carried out  
219 for 32 cells in three independent experiments (see Figure S4 and Movie S5 & S6 for further  
220 examples). While both WT and Ex6KO cells formed podosomes, we found that the number of  
221 cells with podosomes were significantly lower for Ex6KO than for WT cells (fraction of

222 podosome-forming cells  $\pm$  SEM: WT:  $0.66 \pm 0.09$ ,  $n = 5$ , 3 and 4; Ex6KO:  $0.11 \pm 0.11$ ,  $n = 5$ ,  
223 6 and 9,  $t$ -test:  $p = 0.02$ ).

## 224 ***Discussion***

225 We successfully developed a cellular knockout model via CRISPR-Cas9n to study the potential  
226 role of the *KIAA0319* gene in cilia and cell migration on the basis of the proposed roles of this  
227 gene in the literature [2]. Overall, we found that loss of KIAA0319 in RPE1 cells results in  
228 elongation of the cilia and an increase of the force the cells apply on the substrate.

229 Our results suggest a role of KIAA0319 as negative regulator of cilia length. Although the same  
230 fraction of KIAA0319 knockout and WT cells developed cilia, these were significantly longer  
231 in the knockout (Figure 2C). Atypical cilia length has also been described for the knockdown  
232 of Nuclear Distribution Element 1 (*NDE1*), another gene associated with brain cortex  
233 development [28]. Cilia formation is a tightly regulated process, and cilia length has functional  
234 consequences on processes that include cell cycle re-entry and left-right patterning. Cilia  
235 biology is emerging as a contributing factor to a range of diseases, including  
236 neurodevelopmental disorders [2]. Other genes implicated in dyslexia have been reported to  
237 affect cilia length as well. Knockouts for *dyx1c1* present shorter cilia than the wild type in  
238 zebrafish [29], and overexpression of *Dcdc2* increases cilia length in rat neurons [30]. The only  
239 previous evidence in support of a role of KIAA0319 in cilia comes from transcriptomic studies  
240 [9–11]. Our work is therefore the first study to support a role for KIAA0319 in cilia biology in  
241 a biological model and paves the way for future studies aimed at dissecting the cellular function  
242 of this protein.

243 Investigations on soft ERISM substrates showed that KIAA0319 knockout cells move  
244 significantly faster than wild type cells ( $p = 0.02$ ; Figure 3C) and suggest, that KIAA0319 plays  
245 a role in regulating single cell migration. However, when assessing collective cell migration  
246 with the commonly used scratch assay, we did not observe a significant effect of the KIAA0319  
247 knockout (Figure S1). Several factors might contribute to the different results obtained in these  
248 two experiments. First, individual cells might have different migration properties than a layer  
249 of collectively migrating cells. Second, the apparent stiffness of the ERISM sensor is in the  
250 range of soft tissue (1 to 20 kPa) and significantly different from the stiffness of the cell culture  
251 plastic plate in which the scratch assay was performed ( $\sim 100,000$  kPa) [31]. Substrate stiffness  
252 has a strong influence on cell migration in vitro [32]. Furthermore, while cells respond to an  
253 acute event, namely local damage, in the scratch assay, the ERISM assay observes the



254 migration of undisturbed cells. Cell attachment proteins are another important factor in cell  
255 migration *in vitro*. Both the scratch assay and the ERISM measurements initially used serum  
256 containing media and we thus expect that proteins in the serum adhere to the substrate in both  
257 cases. However, in the case of the scratch assay, the medium was changed to serum free media  
258 after performing the scratch.

259 The ERISM analysis further revealed that the knockout cells exert significantly stronger forces  
260 on their substrate compared to the wild type (Figure 3D). A rescue experiment recovered the  
261 mechanical activity of the wild type phenotype (Figure 4C), supporting an involvement of  
262 KIAA0319 in cellular forces.

263 Fluorescent staining strongly indicated the presence of podosomes in both WT and KIAA0319  
264 knockout cells (Figure 5). By combining fluorescence staining with Fourier-filtered ERISM  
265 measurements, we found that the actin cores of podosomes protruded vertically into the  
266 substrate, exerting oscillating forces of up to 80 pN, while surrounding rings of pulling sites  
267 were tightly colocalised with vinculin. Our work shows for the first time that epithelial  
268 podosomes mechanically probe the environment by exerting oscillating forces in the pN-range,  
269 similarly to what has been previously described for podosomes formed by macrophages  
270 [21,23]. While both WT and Ex6KO cells formed podosomes, we found that the fraction of  
271 cells with podosomes were significantly lower for KIAA0319 knockout than for WT cells (Fig  
272 5E).

273 KIAA0319 is a transmembrane protein that contains five PKD domains. These domains have  
274 been described in very few human proteins, the best characterised of which is Polycystin-1  
275 (PC1). PC1 acts as a mechanosensor in the membrane of cilia [33], most probably by unfolding  
276 of the highly extensible PKD domains in response to stretching forces. It has been proposed  
277 that this unfolding maintains contact between neighbouring cells during cell movement [34].  
278 PC1 interacts with the cytoskeleton [35] and plays an important role in adaptative cilia  
279 shortening (for example under strong flow) [36]. Therefore, our results suggest that KIAA0319  
280 has a similar function to PC1, affecting both cilia formation and mechanosensing. The  
281 knockout of KIAA0319 not only results in formation of longer cilia, but also in an upregulation  
282 of mechanical forces. The reduction of podosome formation in KIAA0319 knockout cells  
283 compared to the WT further supports the involvement of KIAA0319 in cellular  
284 mechanosensing, as the function of podosomes ranges from cell-matrix adhesion and matrix  
285 degradation to mechanosensing [26]. In epithelial cells, podosomes were found to associate

286 with hemidesmosomes [27], adhesive structures specific to epithelial cells that regulate a wide  
287 range of biological processes including, among others, cell migration, exertion of traction force  
288 and mechanosensing [27,37–40].

289 A difficulty in studying KIAA0319 is the lack of a specific antibody able to detect endogenous  
290 levels of this protein. We overcame this by validating the knockout with a combination of  
291 approaches: we confirmed loss-of-function deletions in the sixth exon of KIAA0319 that cause  
292 stop codons early in the transcript (exon 6 out of 21), so that the knockout cells cannot produce  
293 a functional protein. We detected a strong decrease in the expression of KIAA0319, consistent  
294 with nonsense mediated decay of the transcript (Figure 1D) due to the loss-of-function  
295 deletions.

296 In summary, our work shows that knockout of KIAA0319 affects processes controlled by the  
297 cytoskeleton including cell migration, cilia length, podosome formation and cellular forces.  
298 Earlier studies showed that KIAA0319 overexpression inhibits axon growth and KIAA0319  
299 knockout results in neurite outgrowth [18] – two further processes controlled by cytoskeleton  
300 filaments. As a transmembrane protein KIAA0319 might have an involvement in linking the  
301 cellular cytoskeleton to the extracellular matrix. Further work should therefore expand our  
302 studies on surfaces coated with specific extracellular matrix proteins. Due to its involvement  
303 in the regulation of cilia and cell forces, we speculate that the *KIAA0319* gene might play an  
304 important role during neurodevelopment. Such processes are being increasingly associated  
305 with neurodevelopmental disorders including schizophrenia, depression, bipolar disorder [41]  
306 and autism [42].

307

## 308 ***Materials and Methods***

### 309 ***Cell culture***

310 hTERT-RPE1 cells were generated by transfection with pGRN145, which expresses hTERT  
311 under the control of the MPSV promoter, and were kindly supplied by Dr. Andrea Bodnar,  
312 Geron Inc. Cell lines were cultured in complete media (DMEM F12 with 10% of fetal bovine  
313 serum and 1% Penicillin/Streptomycin), or in serum-free media (DMEM F12 with 1%  
314 Penicillin/Streptomycin) at 37 °C and 5% CO<sub>2</sub>.

### 315 ***Plasmids***

316 pSPgRNA was a gift from Charles Gersbach (Addgene plasmid #47108) [43]. pSPCas9n-2A-  
317 GFP (pSpCas9n(BB)-2A-GFP (PX461)) was a gift from Feng Zhang (Addgene plasmid  
318 #48140) [44]. KIAA0319-GFP was a gift from Antonio Velayos-Baeza [15].

### 319 *Cloning and transfection*

320 KIAA0319 knockout cell lines were generated through a CRISPR-Cas9 double nicking  
321 strategy designed with the web-based tool developed by Hsu and collaborators  
322 (<http://crispr.mit.edu>) [45]. This strategy uses Cas9 nickase (Cas9n), a modified Cas9 in which  
323 one of the nuclease domains has been mutated, lowering the rate of off-target effects compared  
324 to Cas9 [44]. RPE1 cells were transfected with pSpCas9n(BB)-2A-GFP (PX461) and paired  
325 gRNAs, using Lipofectamine3000 (ThermoFisher). gRNAs were generated by cloning  
326 annealed oligonucleotides containing the protospacer sequence into the chimeric gRNA  
327 sequence in pSPgRNA linearised with BbsI, downstream of a U6 promoter (Table S1).  
328 Sequences targeted were AGCCACCCACAGACTACCA and  
329 TAAATTCCATTCATAGTTGT on KIAA0319 exon 6. pSpCas9n(BB)-2A-GFP (PX461)  
330 contains a GFP expression cassette that acts as indicator of positive transfection. Twenty-four  
331 hours after transfection, 384 individual GFP positive cells (four 96 well plates) were isolated  
332 using Fluorescence Activated Cell Sorting (FACS) and plated onto 96 well plates coated with  
333 Poly-D-Lysine for clonal expansion.

### 334 *Screening*

335 Fifty cells were successfully expanded for further analysis. PCR was performed in all clones  
336 using primers int6-7R and int5-6F, that amplify a 1311 sequence DNA flanking the site  
337 targeted with the gRNAs (Table S1). Amplicons were digested with the restriction enzyme  
338 StyI. One of the used gRNAs targets this sequence, hence mutations caused by this gRNA are  
339 likely to eliminate this site. Amplicons from the 7 clones that showed loss of a StyI site upon  
340 digestion were cloned into Zero Blunt TOPO (ThermoFisher K280020) and sequenced using  
341 primers SP6 and T7. We identified one of these lines as a homozygous knockout as it contains  
342 two types of deletions causing frameshifts and premature stop codons.

### 343 *Immunofluorescence*

344 Cells on the ERISM micro-cavity were fixed with 4% paraformaldehyde (PFA) in PBS at room  
345 temperature for 20 minutes. Immediately after fixation, cells were permeabilised with  
346 0.1% Triton X-100 for 3 minutes and blocked for 30 minutes with 1% BSA in PBS. Cells were

347 then stained for vinculin using anti-vinculin antibody (Merck Millipore, cat. no. 90227, 1:250  
348 in BSA solution, 1 hour at room temperature) and for actin using TRITC-conjugated phalloidin  
349 (MerckMillipore, cat. no. 90228, 1:500 in BSA solution, 1 hour at room temperature). The  
350 nuclei of the cells were stained with DAPI (MerckMillipore, 1:1,000 in BSA), at room  
351 temperature for 3 minutes.

352 RPE1 cells for cilia analysis were cultured on uncoated coverslips for 48 hours with serum-  
353 free media, fixed with 4% PFA for 10 minutes, permeabilised with 0.1% Triton X-100, blocked  
354 with 10% goat serum in PBS, and stained with the ciliary marker ARL13B Antibody Rabbit  
355 polyclonal (17711-1-AP Proteintech) and anti-gamma-tubulin (Abcam 11316). Under serum  
356 starvation, cells stay in G<sub>0</sub> and form cilia. We measured the length of the cilia manually using  
357 ImageJ. To ensure that cilia were positioned flat against the surface of the cell, only cilia that  
358 were completely in focus were considered.

### 359 *Gene expression quantification*

360 qRT-PCRs were performed using Luna OneStep reagent (NEB) on biological triplicates.  
361 KIAA0319 expression was assessed with primers ex11F and ex12R (Table S1). Analysis was  
362 performed by the  $\Delta\Delta C_t$  method using Beta-actin as endogenous control. Results were  
363 normalised against expression in WT cells. Error bars are calculated using the standard  
364 deviation of the triplicates ( $2^{\Delta\Delta C_t-s.d} - 2^{\Delta\Delta C_t+-s.d}$ ).

### 365 *Western blot*

366 Protein lysates were obtained from all cell lines using RIPA buffer and separated in a NuPAGE  
367 Bis-Tris 4-12% gradient gel (ThermoFisher). Proteins were transferred to a nitrocellulose  
368 membrane, blocked in WesternBreeze blocker (ThermoFisher) and incubated with primary  
369 antibodies anti-GFP (Chromotek #029762) and anti-beta actin (Sigma). Secondary antibodies  
370 were donkey anti-rat and anti-mouse HRP conjugated. Membranes were developed using  
371 SuperSignal WestFemto substrate (ThermoFisher).

### 372 *Scratch assay*

373 The scratch assay is a simple way to measure cell migration in vitro and consists on creating a  
374 “scratch” on a confluent layer of cells and quantifying the movement of the cells over time to  
375 close this gap [46]. Since this test is performed in serum free culture conditions, which prevent  
376 the cells from dividing, it only takes into account cell movement and not proliferation. Wild  
377 type and Ex6KO cell lines were plated on a 6-well plastic plate (Nunclon Delta Surface,

378 ThermoFisher Scientific). When confluent, the layer of cells was scratched with a pipette tip  
379 creating a straight gap. Cells were then washed with PBS to remove media and floating cells,  
380 and serum free media was added. We took images covering the whole gap at the time of the  
381 scratch (time 0) and after 24 hours. We measured the width of the scratch using TScratch [47],  
382 and calculated the mean width for each cell line after 24 hours.

### 383 *ERISM measurements*

384 ERISM substrates were fabricated as described previously (Kronenberg, 2017) and four silicon  
385 chambers (surface area: 0.75 x 0.75 cm<sup>2</sup>; Ibidi) were applied. RPE1 cells were seeded on the  
386 ERISM substrate at 1,000 cells per well and kept at 37 °C, 5% CO<sub>2</sub> culture conditions in  
387 DMEM-12 supplemented with 10% FBS and 1% Penicillin/Streptomycin. WT and Ex6KO  
388 cells as well as WT, WT\_K-GFP, Ex6KO and Ex6KO\_K-GFP cells were investigated in  
389 different wells on the same ERISM chip. Prior to ERISM measurements, cells were cultured  
390 for 24 h to allow adhesion to complete. ERISM force measurements were performed and  
391 converted into displacement maps as described before [21]. To investigate forces during cell  
392 migration, ERISM maps were recorded continuously for 17 h at intervals of 5 minutes,  
393 recording from seven different positions within each of the respective wells with a x20  
394 objective. To analyse the force exertion patterns, ERISM measurements were performed at  
395 higher frame rate (every 5 s or 2 min) and magnification (x40 objective). To generate the  
396 Fourier-filtered ERISM maps, a FFT bandpass filter was applied to the raw displacement maps  
397 using the ImageJ software. For cell force analysis, the volume by which migrating cells indent  
398 into the ERISM substrate was calculated using ImageJ. All pixels in the ERISM displacement  
399 maps with indentation of less than 20 nm were set to NaN's (not a number) and the "indented  
400 volume" under each individual cell was calculated as the product of area and mean indentation.  
401 Only cells that moved freely for >4 h (i.e. that were not in physical contact with other cells)  
402 were included in the analysis.

403 The "indentation force" of a single podosome protrusion was calculated by converting spatial  
404 Fourier-filtered ERISM displacement maps with a cut-off frequency of 0.6 μm<sup>-1</sup> into stress  
405 maps using FEM as described in [21] . Podosome protrusions were identified in stress maps  
406 as isolated, localised indentation surrounded by a ring of pulling. Indentation force was  
407 calculated as the product of indentation area and mean applied stress at a threshold of 4 Pa.  
408 Only structures that colocalise with actin-dots in the respective immunostaining image were  
409 analysed.

410 To calculate the “contraction force” of single focal adhesions, the twist in spatial Fourier-  
411 filtered ERISM displacement maps with a cut-off frequency of  $0.6 \mu\text{m}^{-1}$  were analysed and  
412 converted into the corresponding horizontally exerted contractile forces as described in [21].  
413 In short, twisting results from the torque applied by focal adhesions when transmitting  
414 contractile cell forces to the ERISM substrate. The twisting response of ERISM substrates was  
415 calibrated by applying horizontal forces using AFM. The amount of twisting was found to be  
416 directly proportional to the applied force (6.6 nm of twist per 1 nN of applied force;  $R^2 > 0.99$ ;  
417  $n = 5$  force measurements). Only twists in ERISM displacement maps that form around  
418 vinculin-rich areas in the respective immunostaining image were analysed.

419 The speed of the cells on the ERISM sensor was measured using the plugin Manual Tracking  
420 on ImageJ[48]. The “straightness” of cell migration was calculated as the ratio of the effective  
421 displacement of the cell relative to the position at the start of the measurement and the track  
422 length. Cell areas were measured from single phase contrast images by drawing the outline of  
423 the cells in ImageJ..

#### 424 *Generation of cell lines expressing KIAA0319-GFP*

425 RPE1 wild type and Ex6KO were transfected with linearised KIAA0319-GFP plasmid using  
426 Lipofectamine 3000 according to the manufacturer’s specifications. KIAA0319-GFP contains  
427 a neomycin resistance cassette that was used to select cells that had undergone stable  
428 transfection, integrating the construct in their genome. Stably transfected cells were selected  
429 with G418 (Roche) at a concentration of  $400 \mu\text{g ml}^{-1}$  for 2 weeks. Cells tend to lose the  
430 expression of the transgene with time [50], and after a few passages of this cell line, GFP  
431 expression was detected in only a small percentage of the cells. To enrich cells expressing the  
432 construct, we selected GFP positive cells via FACS. After FACS selection, cells were kept in  
433 culture for 24 hours to allow them to recover, and then plated onto the ERISM microcavity for  
434 measurement.

#### 435 *Acknowledgements*

436 **Funding:** This work was supported by Action Medical Research/ The Chief Scientist (CSO)  
437 Office, Scotland [GN 2614], Royal Society [RG160373], Carnegie Trust [50341], and RS  
438 Macdonald Charitable Trust grants to SP and Engineering and Physical Sciences Research  
439 Council [EP/P030017/1], Biotechnology and Biological Sciences Research Council

440 [BB/P027148/1], and the European Research Council Starting Grant ABLASE [640012]  
441 grants to MCG. SP is a Royal Society University Research Fellow.

442 **Author contributions:** RD and NMK conducted the experiments and analyzed the data with  
443 support from AM and PL. ACR assisted with the generation of the cell lines. RD and NMK  
444 wrote the manuscript with input from all authors. MCG and SP co-supervised the work.

445 We thank Dr. Samantha Pitt and Dr. Swati Arya for their suggestions to improve the  
446 manuscript.

447 **Competing interests:** The authors declare that they have no competing interests.

448 **Data and materials availability:** All data needed to evaluate the conclusions in the paper are  
449 present in the paper and/or the Supplementary Materials. Additional data related to this paper  
450 are available via <https://doi.org/...>

451 **Figures**

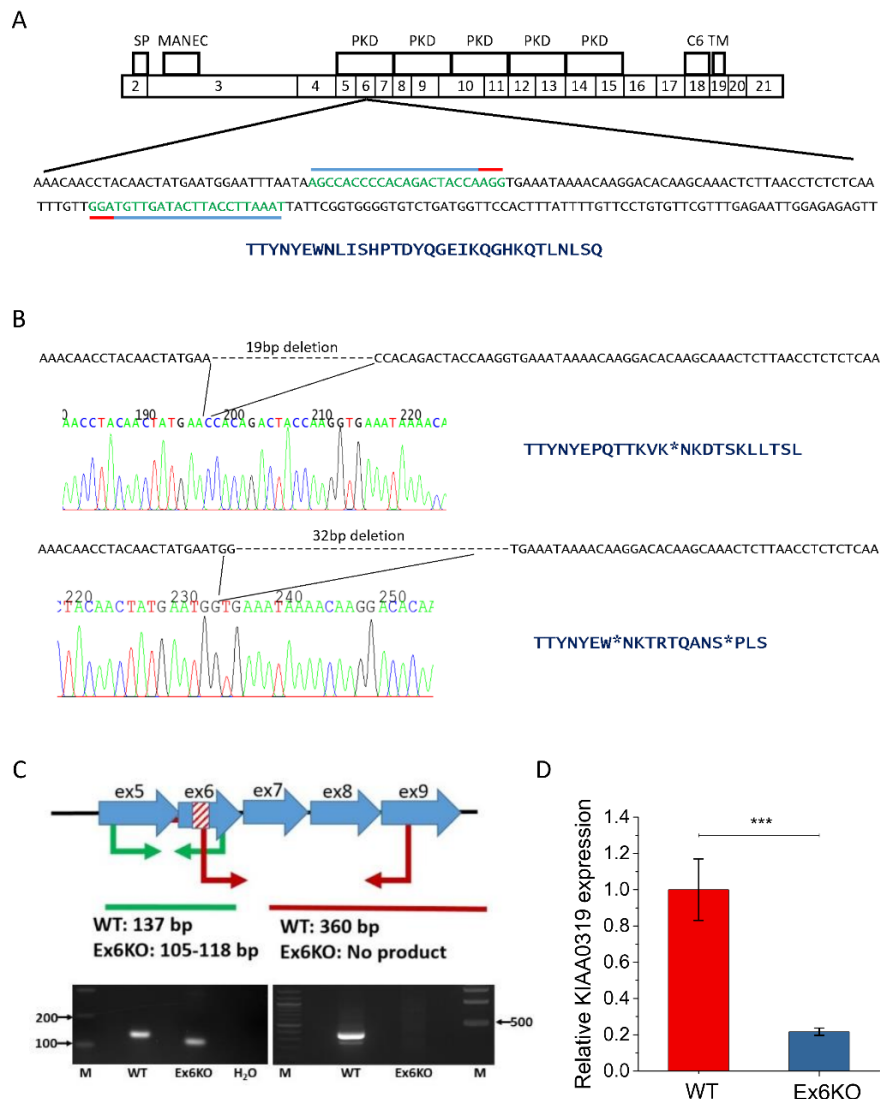

452

453 **Figure 1. Generation of a cellular KIAA0319 knockout**

454 (A) Top: Structure of Human KIAA0319 (based on [15] and Ensembl release 94 [51]). The diagram  
 455 shows the correspondence between protein domains and coding exons in KIAA0319. Signal peptide  
 456 (SP), MANEC domain (MANEC), PKD domains (PKD), cysteine residues (C6) and transmembrane  
 457 domain (TM) are indicated. Bottom: full DNA sequence of KIAA0319 exon 6 with target sequences  
 458 for the gRNAs indicated with blue lines. Red lines show the position of the PAM sequences. Translated  
 459 sequence of amino acids for the targeted exon is shown below the DNA sequence. (B) Chromatograms  
 460 of the deletions found in Ex6KO and translated corresponding amino acids for wild type and knockout  
 461 cell line. Asterisks indicate premature stop codons. (C) Results of the PCR screening to confirm the  
 462 deletions in Ex6KO. The cartoon on the left represents the screening strategy. Two sets of primers were  
 463 designed to give different bands in the WT and KO. The striped area indicates the 19 and 32 base pair  
 464 (bp) deletions in the exon 6 of KIAA0319. The first set of primers (Ex\_6R and Ex\_5F) amplifies the



465 region around the deletion and therefore a smaller band is expected for the KO (105 – 118 bp) compared  
466 to the WT (137 bp). The second pair (Ex9\_R/Ex6delF) has one primer mapping within the deletion.  
467 PCR is expected to give a band of 360 bp in the WT and no product in the KO. Images below confirm  
468 the expected results for both pairs. **(D)** Quantification of KIAA0319 mRNA in WT and Ex6KO by  
469 qPCR. KIAA0319 expression is significantly lower in Ex6KO (Student's *t*-test:  $p \leq 0.0001$ ), consistent  
470 with nonsense mediated decay of the mRNA caused by the deletion.

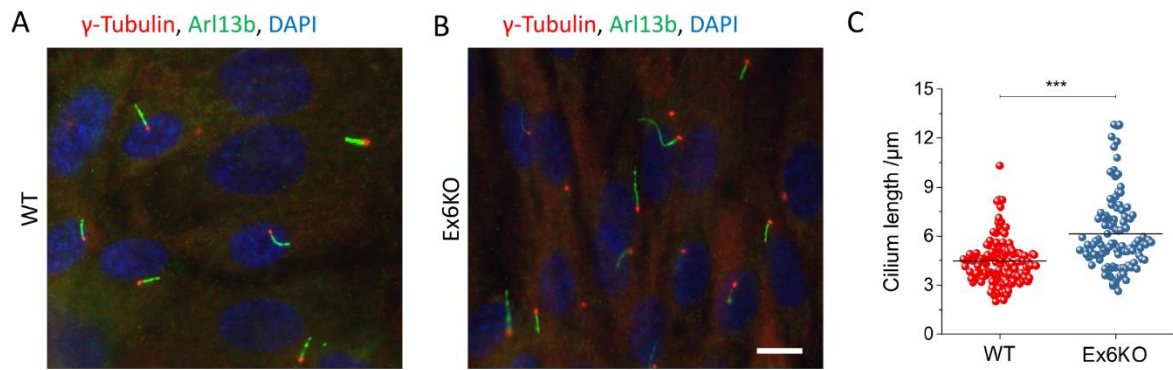

471

472 **Figure 2. Analysis of the cilia length**

473 Representative immunofluorescence images of RPE1 wild type (A) and Ex6KO (B), stained for cilia  
474 marker Arl13b (green), centrosomal marker  $\gamma$ -tubulin (red), and DAPI (blue). (C) Plot of the cilia length  
475 for wild type ( $n = 129$ ) and Ex6KO cells ( $n = 104$ ). Groups were compared using the Student's  $t$ -test  
476 (\*\*\*:  $p \leq 0.001$ ). Scale bar, 10  $\mu\text{m}$ .

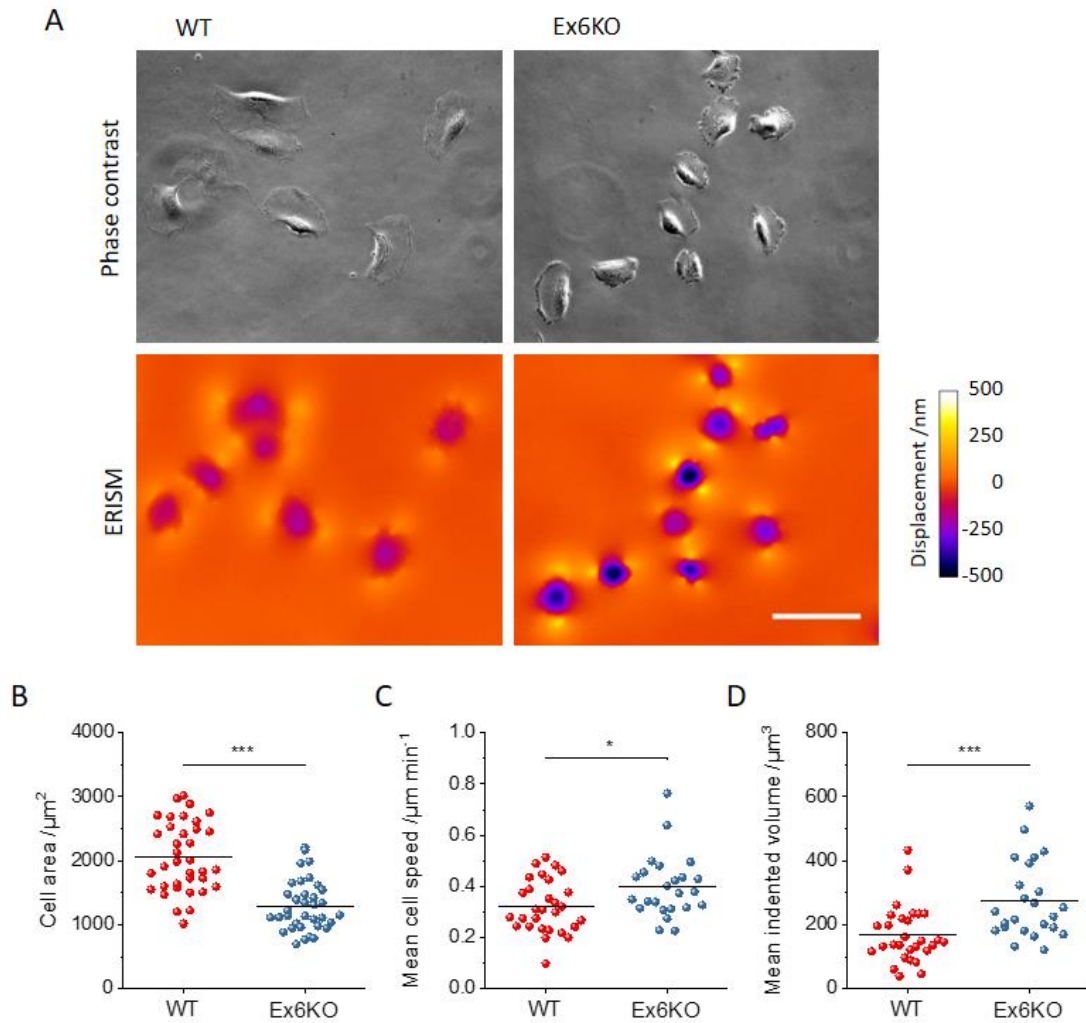

477

478 **Figure 3. Analysis of mechanical activity of RPE1 WT and Ex6KO cells during migration on an**  
479 **ERISM micro-cavity**

480 (A) Phase contrast (upper row) and ERISM micro-cavity displacement maps (lower row) of WT (left)  
481 and Ex6KO (right) cells. (B) Comparison of the surface area covered by WT ( $n = 36$ ) and Ex6KO ( $n$   
482  $= 36$ ) cells types. (C) Comparison of mean speed of WT ( $n = 29$ ) and Ex6KO ( $n = 24$ ) cells. (D)  
483 Comparison of mean indented volume of WT ( $n = 29$ ) and Ex6KO ( $n = 24$ ) cells. Only cells with free  
484 movement for  $\geq 2$  h were included in analysis of speed and indented volume. Plots in (B), (D) and (E)  
485 show all measured data points and the mean (line). Groups were compared using the Student's  $t$ -test (\*:  
486  $p \leq 0.05$ , \*\*:  $p \leq 0.01$ , \*\*\*:  $p \leq 0.001$ ). Scale bar, 50  $\mu\text{m}$ .

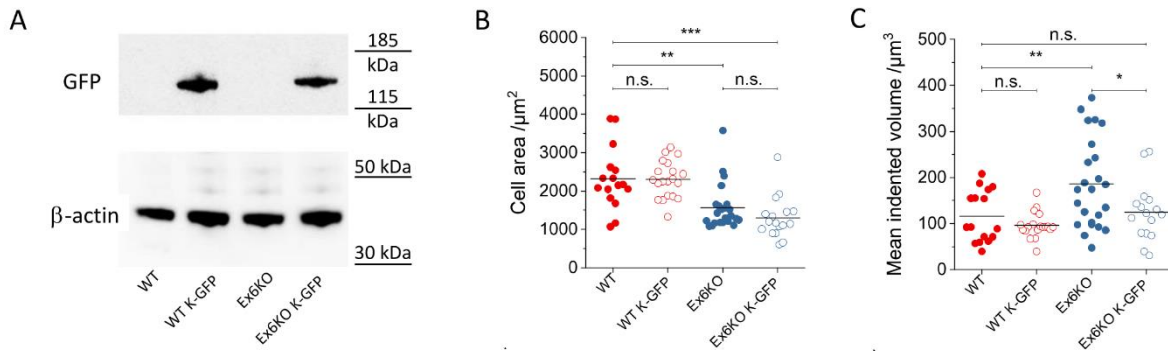

487

488 **Figure 4. Phenotype recovery through KIAA0319 rescue**

489 (A) Western blot confirming the presence of a fusion protein (140 KDa) following transfection with a  
490 full length KIAA0319 construct fused to a GFP tag. (B) Comparison of area covered by RPE1 WT,  
491 WT K-GFP, Ex6KO and Ex6KO K-GFP cells attached to ERISM micro-cavity. (WT:  $n = 16$ , WT K-  
492 GFP:  $n = 20$ , Ex6KO:  $n = 23$ , Ex6KO K-GFP:  $n = 17$ ) (C) Comparison of mean mechanical activity  
493 of RPE1 WT, WT K-GFP, Ex6KO and Ex6KO K-GFP cells during migration on ERISM micro-  
494 cavity. Only cells with free movement for  $>4$  h were included in the analysis. Plots in B and C show  
495 measured data points and the mean (line). (WT:  $n = 16$ , WT K-GFP:  $n = 19$ , Ex6KO:  $n = 24$ , Ex6KO  
496 K-GFP:  $n = 16$ ) Groups were compared using the Student's  $t$ -test (\*:  $p \leq 0.05$ , \*\*:  $p \leq 0.01$ , \*\*\*:  
497  $p \leq 0.001$ ).

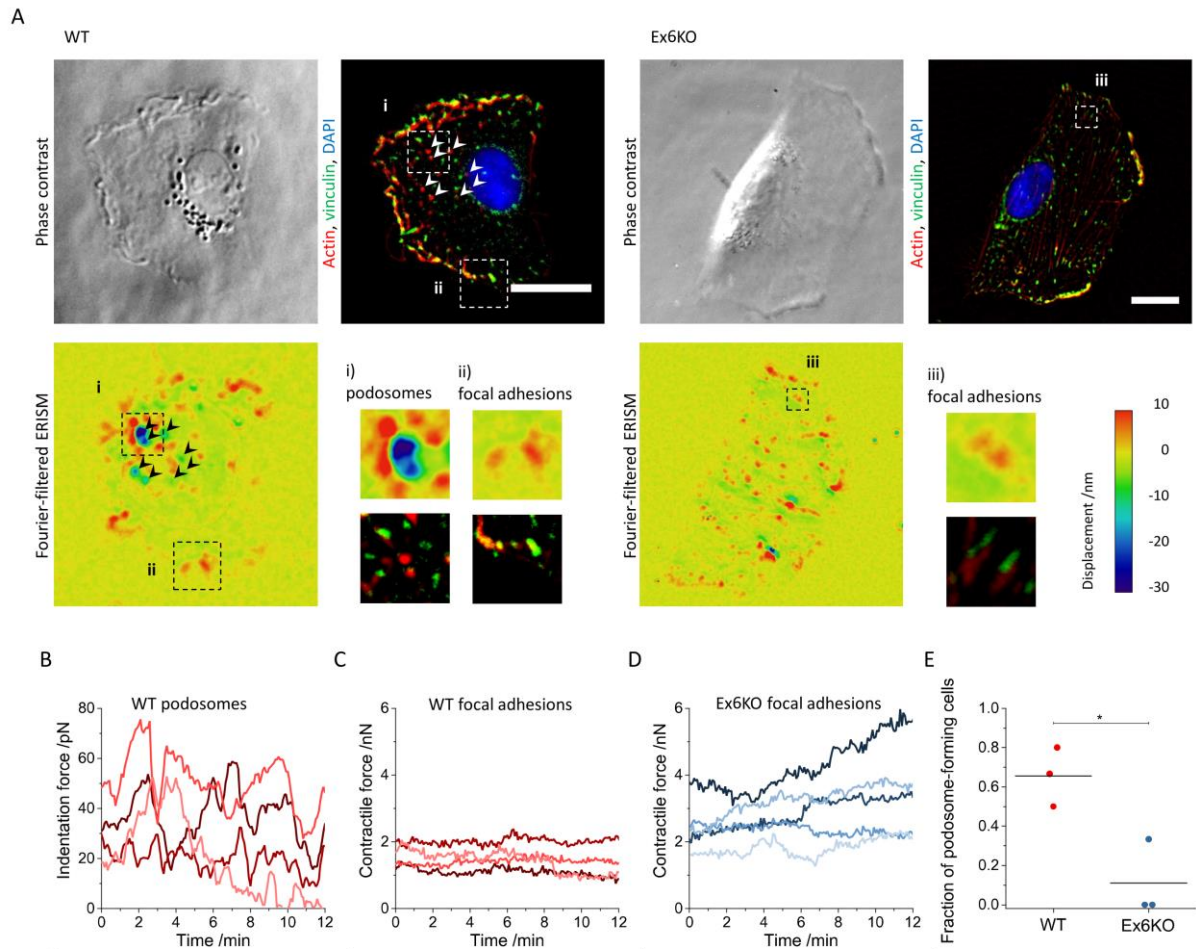

498

499 **Figure 5. RPE1 KIAA0319 WT and Ex6KO cells use different modes of force exertion**

500 (A) Phase contrast images (upper row), Fourier-filtered ERISM displacement maps (middle row) and  
 501 epi-fluorescence images (lower row, red: actin, green: vinculin, blue: nuclear DNA) of a RPE1 WT  
 502 cell (left column) and an Ex6KO cell (right column). Arrow heads indicate positions of actin-rich cell  
 503 protrusions (podosomes). The insets i) in the Fourier-filtered ERISM map and the epi-fluorescence  
 504 image of the WT cell show magnifications of podosome protrusions. The insets ii) and iii) show  
 505 magnifications of vinculin-rich cell-substrate contacts (focal adhesions) for the WT and Ex6KO cell,  
 506 respectively (B) Temporal evolution of the indentation force applied by different podosomes of the  
 507 WT cell shown in A. (C) and (D) Temporal evolution of the contraction force applied by different  
 508 focal adhesions of the WT and Ex6KO cell shown in A, respectively. (E) Comparison of the fraction  
 509 of podosome-forming WT and Ex6KO cells. Each data point represents the mean value of an  
 510 independent experiment investigating  $n = 5$  (80%), 3 (67%) and 4 (50%) WT and  $n = 5$  (0%), 6 (0%)  
 511 and 9 (33%) Ex6KO cells, respectively. The lines depict the means. Groups were compared using the  
 512 Student's t-test (\*:  $p \leq 0.05$ ). All scale bars: 20  $\mu\text{m}$ .

## 513 **References**

- 514 1. Peterson RL, Pennington BF. Developmental dyslexia. *Lancet*. 2012;379: 1997–2007.  
515 doi:10.1016/S0140-6736(12)60198-6
- 516 2. Paracchini S, Diaz R, Stein J. Advances in Dyslexia Genetics—New Insights Into the Role of  
517 Brain Asymmetries. *Advances in Genetics*. Elsevier Ltd; 2016.  
518 doi:10.1016/bs.adgen.2016.08.003
- 519 3. Paracchini S, Scerri T, Monaco AP. The genetic lexicon of dyslexia. *Annu Rev Genomics*  
520 *Hum Genet*. 2007;8: 57–79. doi:10.1146/annurev.genom.8.080706.092312
- 521 4. Galaburda AM, Sherman GF, Rosen GD, Aboitz F, Geschwind N. Developmental Dyslexia:  
522 Four consecutive patients with cortical anomaly. *Ann Neurol*. 1985;18: 222–223.  
523 doi:10.1002/ana.410180210
- 524 5. Guidi LG, Velayos-Baeza A, Martinez-Garay I, Monaco AP, Paracchini S, Bishop DVM, et al.  
525 The Neuronal Migration Hypothesis of Dyslexia: A Critical Evaluation Thirty Years On. *Eur J*  
526 *Neurosci*. 2018; 3212–3233. doi:10.1111/ejn.14149
- 527 6. Rosen GD, Bai J, Wang Y, Fiondella CG, Threlkeld SW, Loturco JJ, et al. Disruption of  
528 neuronal migration by RNAi of *Dyx1c1* results in neocortical and hippocampal malformations.  
529 *Cereb Cortex*. 2007;17: 2562–2572. doi:10.1093/cercor/bhl162
- 530 7. Galaburda AM. The Role of Rodent Models in Dyslexia Research: Understanding the Brain,  
531 Sex Differences, Lateralization, and Behavior. In: Lachmann T, Weis T, editors. *Reading and*  
532 *Dyslexia: From Basic Functions to Higher Order Cognition*. Cham: Springer International  
533 Publishing; 2018. pp. 77–96. doi:10.1007/978-3-319-90805-2\_5
- 534 8. Centanni TM. Neural and Genetic Mechanisms of Dyslexia. In: Argyropoulos GPD, editor.  
535 *Translational Neuroscience of Speech and Language Disorders*. Cham: Springer International  
536 Publishing; 2020. pp. 47–68. doi:10.1007/978-3-030-35687-3\_4
- 537 9. Geremek M, Ziętkiewicz E, Bruinenberg M, Franke L, Pogorzelski A, Wijmenga C, et al.  
538 Ciliary genes are down-regulated in bronchial tissue of primary ciliary dyskinesia patients.  
539 *PLoS One*. 2014;9. doi:10.1371/journal.pone.0088216
- 540 10. Hoh R a, Stowe TR, Turk E, Stearns T. Transcriptional program of ciliated epithelial cells  
541 reveals new cilium and centrosome components and links to human disease. *PLoS One*.  
542 2012;7: e52166. doi:10.1371/journal.pone.0052166
- 543 11. Ivliev AE, 't Hoen P a C, van Roon-Mom WMC, Peters DJM, Sergeeva MG. Exploring the  
544 transcriptome of ciliated cells using in silico dissection of human tissues. *PLoS One*. 2012;7:

- 545 e35618. doi:10.1371/journal.pone.0035618
- 546 12. Brandler WM, Paracchini S. The genetic relationship between handedness and  
547 neurodevelopmental disorders. *Trends Mol Med*. 2013; 1–8.  
548 doi:10.1016/j.molmed.2013.10.008
- 549 13. Pruski M, Lang B. Primary Cilia—An Underexplored Topic in Major Mental Illness. *Front*  
550 *Psychiatry*. 2019;10. doi:10.3389/FPSYT.2019.00104
- 551 14. Velayos-Baeza A, Toma C, da Roza S, Paracchini S, Monaco AP. Alternative splicing in the  
552 dyslexia-associated gene KIAA0319. *Mamm Genome*. 2007;18: 627–34. doi:10.1007/s00335-  
553 007-9051-3
- 554 15. Velayos-Baeza A, Toma C, Paracchini S, Monaco AP. The dyslexia-associated gene  
555 KIAA0319 encodes highly N- and O-glycosylated plasma membrane and secreted isoforms.  
556 *Hum Mol Genet*. 2008;17: 859–71. doi:10.1093/hmg/ddm358
- 557 16. Ibraghimov-Beskrovnyaya O, Bukanov NO, Donohue LC, Dackowski WR, Klinger KW,  
558 Landes GM. Strong homophilic interactions of the Ig-like domains of polycystin-1, the protein  
559 product of an autosomal dominant polycystic kidney disease gene, PKD1. *Hum Mol Genet*.  
560 2000;9: 1641–9. Available: <http://www.ncbi.nlm.nih.gov/pubmed/10861291>
- 561 17. Velayos-Baeza A, Levecque C, Kobayashi K, Holloway ZG, Monaco AP. The dyslexia-  
562 associated KIAA0319 protein undergoes proteolytic processing with {gamma}-secretase-  
563 independent intramembrane cleavage. *J Biol Chem*. 2010;285: 40148–62.  
564 doi:10.1074/jbc.M110.145961
- 565 18. Franquinho F, Nogueira-Rodrigues J, Duarte JM, Esteves SS, Carter-Su C, Monaco AP, et al.  
566 The Dyslexia-susceptibility Protein KIAA0319 Inhibits Axon Growth Through Smad2  
567 Signaling. *Cereb Cortex*. 2017;27: 1732–1747. doi:10.1093/cercor/bhx023
- 568 19. Gostic M, Martinelli A, Tucker C, Yang Z, Ewart FGJ, Dholakia K, et al. The dyslexia  
569 susceptibility KIAA0319 gene shows a specific expression pattern during zebrafish  
570 development supporting a role beyond neuronal migration. *J Comp Neurol*. 2019; 1–10.  
571 doi:10.1002/cne.24696
- 572 20. Wu G De, Li ZH, Li X, Zheng T, Zhang DK. microRNA-592 blockade inhibits oxidative  
573 stress injury in Alzheimer’s disease astrocytes via the KIAA0319-mediated Keap1/Nrf2/ARE  
574 signaling pathway. *Exp Neurol*. 2020;324: 113128. doi:10.1016/j.expneurol.2019.113128
- 575 21. Kronenberg NM, Liehm P, Steude A, Knipper JA, Borger JG, Scarcelli G, et al. Long-term  
576 imaging of cellular forces with high precision by elastic resonator interference stress

- 577 microscopy. *Nat Cell Biol.* 2017;19: 864–872. doi:10.1038/ncb3561
- 578 22. Liehm P, Kronenberg NM, Gather MC. Analysis of the Precision, Robustness, and Speed of  
579 Elastic Resonator Interference Stress Microscopy. *Biophys J.* 2018; 2180–2193.  
580 doi:10.1016/j.bpj.2018.03.034
- 581 23. Labernadie A, Bouissou A, Delobelle P, Balor S, Voituriez R, Proag A, et al. Protrusion force  
582 microscopy reveals oscillatory force generation and mechanosensing activity of human  
583 macrophage podosomes. *Nat Commun.* 2014;5: 5343. doi:10.1038/ncomms6343
- 584 24. Baker KE, Parker R. Nonsense-mediated mRNA decay: terminating erroneous gene  
585 expression. *Curr Opin Cell Biol.* 2004;16: 293–299. doi:10.1016/J.CEB.2004.03.003
- 586 25. Legant WR, Choi CK, Miller JS, Shao L, Gao L, Betzig E, et al. Multidimensional traction  
587 force microscopy reveals out-of-plane rotational moments about focal adhesions. *Proc Natl  
588 Acad Sci.* 2013;110: 1–6. doi:10.1073/pnas.1207997110
- 589 26. Linder S, Wiesner C. Feel the force: Podosomes in mechanosensing. *Exp Cell Res.* 2016;343:  
590 67–72. doi:10.1016/J.YEXCR.2015.11.026
- 591 27. Spinardi L, Rietdorf J, Nitsch L, Bono M, Tacchetti C, Way M, et al. A dynamic podosome-  
592 like structure of epithelial cells. *Exp Cell Res.* 2004;295: 360–374.  
593 doi:10.1016/j.yexcr.2004.01.007
- 594 28. Kim S, Zaghloul NA, Bubenshchikova E, Oh EC, Rankin S, Katsanis N, et al. Nde1-mediated  
595 inhibition of ciliogenesis affects cell cycle re-entry. *Nat Cell Biol.* 2011;13: 351–362.  
596 doi:10.1038/ncb2183
- 597 29. Chandrasekar G, Vesterlund L, Hultenby K, Tapia-Páez I, Kere J. The zebrafish orthologue of  
598 the dyslexia candidate gene *DYX1C1* is essential for cilia growth and function. *PLoS One.*  
599 2013;8: e63123. doi:10.1371/journal.pone.0063123
- 600 30. Massinen S, Hokkanen M-E, Matsson H, Tammimies K, Tapia-Páez I, Dahlström-Heuser V, et  
601 al. Increased expression of the dyslexia candidate gene *DCDC2* affects length and signaling of  
602 primary cilia in neurons. *PLoS One.* 2011;6: e20580. doi:10.1371/journal.pone.0020580
- 603 31. Skardal A, Mack D, Atala A, Soker S. Substrate elasticity controls cell proliferation , surface  
604 marker expression and motile phenotype in amniotic fluid-derived stem cells. *J Mech Behav  
605 Biomed Mater.* 2013;17: 307–316. doi:10.1016/j.jmbbm.2012.10.001
- 606 32. Bangasser BL, Shamsan GA, Chan CE, Opoku KN, Tüzel E, Schlichtmann BW, et al. Shifting  
607 the optimal stiffness for cell migration. *Nat Commun.* 2017;8: 15313.  
608 doi:10.1038/ncomms15313



- 609 33. Dalagiorgou G, Basdra EK, Papavassiliou AG. Polycystin-1: Function as a mechanosensor. *Int*  
610 *J Biochem Cell Biol.* 2010;42: 1610–1613. doi:10.1016/J.BIOCEL.2010.06.017
- 611 34. Qian F, Wei W, Germino G, Oberhauser A. The nanomechanics of polycystin-1 extracellular  
612 region. *J Biol Chem.* 2005;280: 40723–30. doi:10.1074/jbc.M509650200
- 613 35. Boca M, D'amato L, Distefano G, Polishchuk RS, Germino GG, Boletta A. Polycystin-1  
614 Induces Cell Migration by Regulating Phosphatidylinositol 3-kinase-dependent Cytoskeletal  
615 Rearrangements and GSK3-dependent Cell-Cell Mechanical Adhesion. *Mol Biol Cell.*  
616 2007;18: 4050–4061. doi:10.1091/mbc.E07-02-0142
- 617 36. Besschetnova TY, Kolpakova-Hart E, Guan Y, Zhou J, Olsen BR, Shah J V. Identification of  
618 Signaling Pathways Regulating Primary Cilium Length and Flow-Mediated Adaptation. *Curr*  
619 *Biol.* 2010;20: 182–187. doi:10.1016/J.CUB.2009.11.072
- 620 37. Hiroyasu S, Colburn ZT, Jones JCR. A hemidesmosomal protein regulates actin dynamics and  
621 traction forces in motile keratinocytes. *FASEB J.* 2016;30: 2298–2310.  
622 doi:10.1096/fj.201500160R
- 623 38. Zhang H, Landmann F, Zahreddine H, Rodriguez D, Koch M, Labouesse M. A tension-  
624 induced mechanotransduction pathway promotes epithelial morphogenesis. *Nature.* 2011;471:  
625 99–103. doi:10.1038/nature09765
- 626 39. Grashoff C, Hoffman BD, Brenner MD, Zhou R, Parsons M, Yang MT, et al. Measuring  
627 mechanical tension across vinculin reveals regulation of focal adhesion dynamics. *Nature.*  
628 2010;466: 263–266. doi:10.1038/nature09198
- 629 40. Walko G, Castañón MJ, Wiche G. Molecular architecture and function of the hemidesmosome.  
630 *Cell Tissue Res.* 2015;360: 363–378. doi:10.1007/s00441-014-2061-z
- 631 41. Marchisella F, Coffey ET, Hollos P. Microtubule and microtubule associated protein  
632 anomalies in psychiatric disease. *Cytoskeleton.* 2016;73: 596–611. doi:10.1002/cm.21300
- 633 42. Lin Y-C, Frei JA, Kilander MBC, Shen W, Blatt GJ. A Subset of Autism-Associated Genes  
634 Regulate the Structural Stability of Neurons. *Front Cell Neurosci.* 2016;10: 263.  
635 doi:10.3389/fncel.2016.00263
- 636 43. Perez-Pinera P, Kocak DD, Vockley CM, Adler AF, Kabadi AM, Polstein LR, et al. RNA-  
637 guided gene activation by CRISPR- Cas9 – based transcription factors. *Nat Methods.* 2013;10:  
638 973–976. doi:10.1038/NMETH.2600
- 639 44. Ran FA, Hsu PD, Wright J, Agarwala V, Scott D a, Zhang F. Genome engineering using the  
640 CRISPR-Cas9 system. *Nat Protoc.* 2013;8: 2281–308. doi:10.1038/nprot.2013.143

- 641 45. Hsu PD, Scott DA, Weinstein JA, Ran FA, Konermann S, Agarwala V, et al. DNA targeting  
642 specificity of RNA-guided Cas9 nucleases. *Nat Biotechnol.* 2013;31: 827–832.  
643 doi:10.1038/nbt.2647
- 644 46. Liang CC, Park AY, Guan JL. In vitro scratch assay: a convenient and inexpensive method for  
645 analysis of cell migration in vitro. *Nat Protoc.* 2007;2: 329–333. doi:nprot.2007.30  
646 [pii]r10.1038/nprot.2007.30
- 647 47. Geback T, Schulz MMP, Koumoutsakos P, Detmar M. TScratch: A novel and simple software  
648 tool for automated analysis of monolayer wound healing assays. *Biotechniques.* 2009;46: 265–  
649 274. doi:10.2144/000113083
- 650 48. Schneider CA, Rasband WS, Eliceiri KW. NIH Image to ImageJ: 25 years of image analysis.  
651 *Nat Methods.* 2012;9: 671–675.
- 652 49. Schindelin J, Arganda-Carreras I, Frise E, Kaynig V, Longair M, Pietzsch T, et al. Fiji: an  
653 open-source platform for biological-image analysis. *Nat Methods.* 2012;9: 676–682.  
654 doi:10.1038/nmeth.2019
- 655 50. Mutskov V, Felsenfeld G. Silencing of transgene transcription precedes methylation of  
656 promoter DNA and histone H3 lysine 9. *EMBO J.* 2004;23: 138–49.  
657 doi:10.1038/sj.emboj.7600013
- 658 51. Zerbino DR, Achuthan P, Akanni W, Ridwan Amode M, Barrell D, Bhai J, et al. Ensembl  
659 2018. *Nucleic Acids Res.* 2018;46. doi:10.1093/nar/gkx1098
- 660
